# Supplementary material
Source: PubMed Central journal article supplement (PMC8914186)
Supplement: 10.1182-2021014124_bloodbld2021014124-suppl1.pdf [file 10.1182-2021014124_bloodbld2021014124-suppl1.pdf]

**Supplemental Figure 1.** Type of vaccine and SARS-Cov-2 variants distribution according geographic areas.

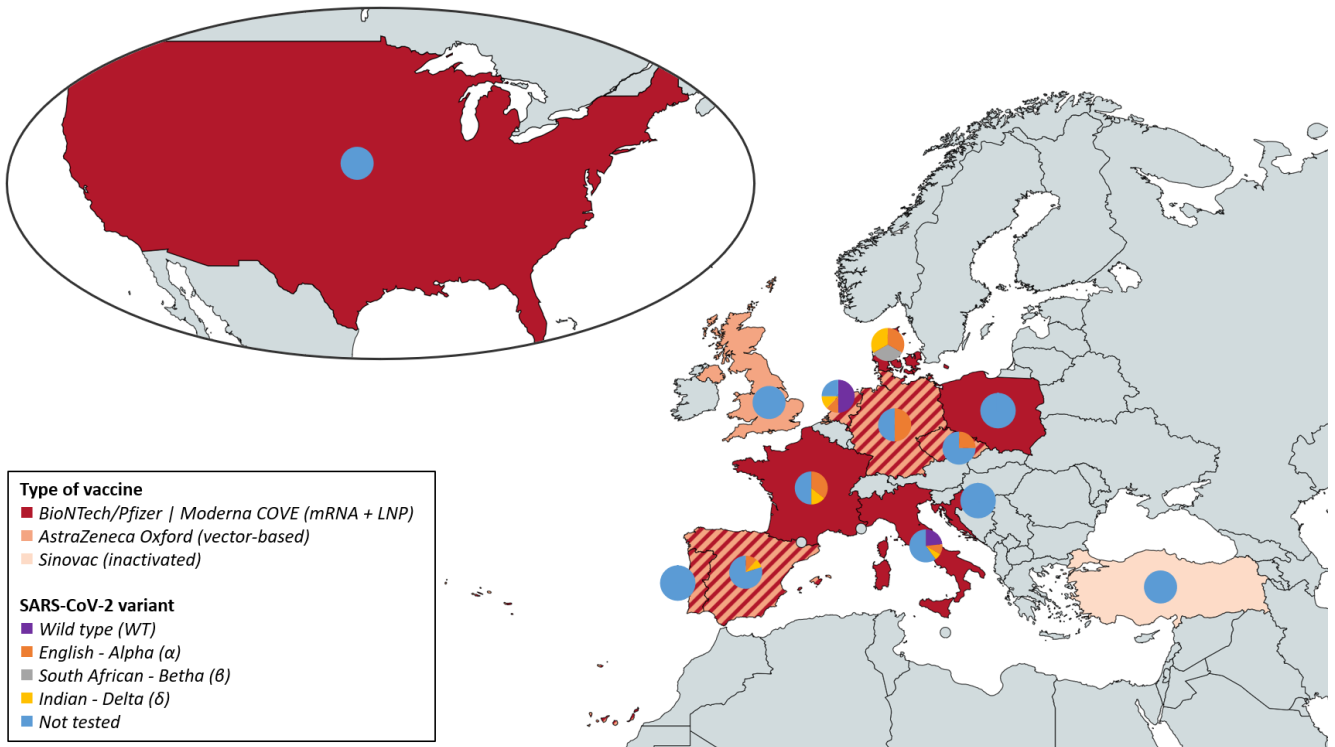

**Supplemental Table 1.** COVID-19 clinical presentation according to different malignancies.

|                           | Alive (d30)  |      |                         |      |                                              |      |                    |      | Death (d30)  |     |                         |     |                                              |     |                    |     |
|---------------------------|--------------|------|-------------------------|------|----------------------------------------------|------|--------------------|------|--------------|-----|-------------------------|-----|----------------------------------------------|-----|--------------------|-----|
|                           | Asymptomatic |      | Extrapulmonary symptoms |      | Extrapulmonary symptoms + Pulmonary symptoms |      | Pulmonary symptoms |      | Asymptomatic |     | Extrapulmonary symptoms |     | Extrapulmonary symptoms + Pulmonary symptoms |     | Pulmonary symptoms |     |
|                           | <i>n</i>     | %    | <i>n</i>                | %    | <i>n</i>                                     | %    | <i>n</i>           | %    | <i>n</i>     | %   | <i>n</i>                | %   | <i>n</i>                                     | %   | <i>n</i>           | %   |
| Acute lymphoid leukemia   | 1            | 0.9  | 1.0                     | 0.9  | 1.0                                          | 0.9  | 0.0                | 0.0  | 0.0          | 0.0 | 0.0                     | 0.0 | 0.0                                          | 0.0 | #                  | 0.0 |
| Chronic lymphoid leukemia | 6            | 5.3  | 3.0                     | 2.7  | 10.0                                         | 8.8  | 7.0                | 6.2  | 1.0          | 0.9 | 0.0                     | 0.0 | 0.0                                          | 0.0 | #                  | 0.9 |
| Acute myeloid leukemia    | 1            | 0.9  | 2.0                     | 1.8  | 1.0                                          | 0.9  | 1.0                | 0.9  | 0.0          | 0.0 | 0.0                     | 0.0 | 0.0                                          | 0.0 | #                  | 0.0 |
| Chronic myeloid leukemia  | 0            | 0.0  | 0.0                     | 0.0  | 0.0                                          | 0.0  | 1.0                | 0.9  | 0.0          | 0.0 | 0.0                     | 0.0 | 0.0                                          | 0.0 | #                  | 0.0 |
| Myelodysplastic syndrome  | 2            | 1.8  | 1.0                     | 0.9  | 0.0                                          | 0.0  | 2.0                | 1.8  | 0.0          | 0.0 | 0.0                     | 0.0 | 2.0                                          | 1.8 | #                  | 0.0 |
| Hodgkin lymphoma          | 1            | 0.9  | 0.0                     | 0.0  | 0.0                                          | 0.0  | 2.0                | 1.8  | 0.0          | 0.0 | 1.0                     | 0.9 | 0.0                                          | 0.0 | #                  | 0.0 |
| Non-Hodgkin lymphoma      | 4            | 3.5  | 1.0                     | 0.9  | 13.0                                         | 11.5 | 12.0               | 10.6 | 0.0          | 0.0 | 1.0                     | 0.9 | 1.0                                          | 0.9 | #                  | 3.5 |
| Myelofibrosis             | 0            | 0.0  | 1.0                     | 0.9  | 1.0                                          | 0.9  | 0.0                | 0.0  | 0.0          | 0.0 | 0.0                     | 0.0 | 0.0                                          | 0.0 | #                  | 0.9 |
| Polycythemia vera         | 1            | 0.9  | 0.0                     | 0.0  | 1.0                                          | 0.9  | 0.0                | 0.0  | 0.0          | 0.0 | 0.0                     | 0.0 | 0.0                                          | 0.0 | #                  | 0.0 |
| Systemic mastocytosis     | 0            | 0.0  | 0.0                     | 0.0  | 0.0                                          | 0.0  | 1.0                | 0.9  | 0.0          | 0.0 | 0.0                     | 0.0 | 0.0                                          | 0.0 | #                  | 0.9 |
| Multiple myeloma          | 6            | 5.3  | 2.0                     | 1.8  | 7.0                                          | 6.2  | 4.0                | 3.5  | 0.0          | 0.0 | 0.0                     | 0.0 | 1.0                                          | 0.9 | #                  | 0.0 |
| Aplastic anemia           | 0            | 0.0  | 1.0                     | 0.9  | 1.0                                          | 0.9  | 0.0                | 0.0  | 0.0          | 0.0 | 0.0                     | 0.0 | 0.0                                          | 0.0 | #                  | 0.0 |
| Overall                   | 22           | 19.5 | 12.0                    | 10.6 | 35.0                                         | 31.0 | 30.0               | 26.5 | 1.0          | 0.9 | 2.0                     | 1.8 | 4.0                                          | 3.5 | #                  | 6.2 |

**Supplemental Table 2.** Overall mortality predictors in vaccinated COVID-19 HM patients

(univariable and multivariable analysis).

|                                                                      | Univariable model |       |          |        | Multivariable model |       |          |        |
|----------------------------------------------------------------------|-------------------|-------|----------|--------|---------------------|-------|----------|--------|
|                                                                      | p value           | HR    | 95.0% CI |        | p value             | HR    | 95.0% CI |        |
|                                                                      |                   |       | Lower    | Upper  |                     |       | Lower    | Upper  |
| <b>Sex</b>                                                           |                   |       |          |        |                     |       |          |        |
| Female                                                               | -                 | -     | -        | -      | -                   | -     | -        | -      |
| Male                                                                 | 0.266             | 0.552 | 0.194    | 1.574  | -                   | -     | -        | -      |
| <b>Age</b>                                                           | 0.046             | 1.044 | 1.001    | 1.088  | 0.035               | 1.053 | 1.004    | 1.105  |
| <b>Malignancy status at COVID-19 diagnosis</b>                       |                   |       |          |        |                     |       |          |        |
| Controlled disease                                                   | -                 | -     | -        | -      | -                   | -     | -        | -      |
| Active disease                                                       | 0.725             | 0.828 | 0.290    | 2.362  | -                   | -     | -        | -      |
| Unknown                                                              | 0.986             | 0.000 | -        | -      | -                   | -     | -        | -      |
| <b>Hematological malignancy</b>                                      |                   |       |          |        |                     |       |          |        |
| Hodgkin lymphoma                                                     | -                 | -     | -        | -      | -                   | -     | -        | -      |
| Chronic lymphoid leukemia                                            | 0.172             | 0.188 | 0.017    | 2.074  | -                   | -     | -        | -      |
| Acute myeloid leukemia                                               | 0.990             | 0.000 | -        | -      | -                   | -     | -        | -      |
| Chronic myeloid leukemia                                             | 0.995             | 0.000 | -        | -      | -                   | -     | -        | -      |
| Acute lymphoid leukemia                                              | 0.994             | 0.000 | -        | -      | -                   | -     | -        | -      |
| Non-Hodgkin lymphoma                                                 | 0.612             | 0.578 | 0.070    | 4.809  | -                   | -     | -        | -      |
| Aplastic anemia                                                      | 0.995             | 0.000 | -        | -      | -                   | -     | -        | -      |
| Multiple myeloma                                                     | 0.256             | 0.200 | 0.013    | 3.207  | -                   | -     | -        | -      |
| Myelodysplastic syndrome                                             | 0.381             | 2.946 | 0.262    | 33.108 | -                   | -     | -        | -      |
| Myelofibrosis                                                        | 0.820             | 1.383 | 0.085    | 22.531 | -                   | -     | -        | -      |
| Polycythemia vera                                                    | 0.995             | 0.000 | -        | -      | -                   | -     | -        | -      |
| Systemic mastocytosis                                                | 0.870             | 1.262 | 0.079    | 20.226 | -                   | -     | -        | -      |
| <b>COVID-19 infection</b>                                            |                   |       |          |        |                     |       |          |        |
| Asymptomatic                                                         | -                 | -     | -        | -      | -                   | -     | -        | -      |
| Mild infection                                                       | 0.554             | 2.309 | 0.144    | 36.950 | 0.405               | 3.263 | 0.202    | 52.630 |
| Severe infection                                                     | 0.290             | 3.100 | 0.381    | 25.206 | 0.204               | 3.899 | 0.477    | 31.850 |
| Critical infection                                                   | 0.064             | 7.637 | 0.890    | 65.519 | 0.048               | 9.533 | 1.023    | 88.816 |
| <b>Baseline characteristics</b>                                      |                   |       |          |        |                     |       |          |        |
| Chronic cardiopathy                                                  | 0.013             | 4.381 | 1.374    | 13.970 | 0.207               | 2.328 | 0.626    | 8.657  |
| Chronic pulmonary disease                                            | 0.148             | 2.569 | 0.715    | 9.227  | -                   | -     | -        | -      |
| Diabetes mellitus                                                    | 0.960             | 0.968 | 0.270    | 3.471  | -                   | -     | -        | -      |
| Liver disease                                                        | 0.895             | 0.872 | 0.114    | 6.670  | -                   | -     | -        | -      |
| Obesity                                                              | 0.620             | 0.047 | -        | -      | -                   | -     | -        | -      |
| Renal impairment                                                     | 0.077             | 3.859 | 0.862    | 17.269 | 0.227               | 2.950 | 0.510    | 17.059 |
| Smoking history                                                      | 0.486             | 1.574 | 0.439    | 5.646  | -                   | -     | -        | -      |
| <b>Neutrophils, cells/mm<sup>3</sup></b>                             |                   |       |          |        |                     |       |          |        |
| ≤ 500                                                                | -                 | -     | -        | -      | -                   | -     | -        | -      |
| 501 - 999                                                            | 0.286             | 0.221 | 0.014    | 3.542  | 0.926               | 0.867 | 0.043    | 17.598 |
| ≥ 1000                                                               | 0.079             | 0.160 | 0.021    | 1.239  | 0.583               | 0.510 | 0.046    | 5.665  |
| <b>Lymphocytes, cells/mm<sup>3</sup></b>                             |                   |       |          |        |                     |       |          |        |
| ≤ 200                                                                | -                 | -     | -        | -      | -                   | -     | -        | -      |
| 201 - 499                                                            | 0.690             | 1.588 | 0.164    | 15.354 | -                   | -     | -        | -      |
| ≥ 500                                                                | 0.848             | 0.817 | 0.103    | 6.452  | -                   | -     | -        | -      |
| <b>Last treatment for hematological malignancy prior to COVID-19</b> |                   |       |          |        |                     |       |          |        |
| In the last month before COVID-19                                    | -                 | -     | -        | -      | -                   | -     | -        | -      |
| In the last 3 months before COVID-19                                 | 0.150             | 3.131 | 0.663    | 14.790 | -                   | -     | -        | -      |

|                                            | Univariable model |       |          |        | Multivariable model |    |          |       |
|--------------------------------------------|-------------------|-------|----------|--------|---------------------|----|----------|-------|
|                                            | p value           | HR    | 95.0% CI |        | p value             | HR | 95.0% CI |       |
|                                            |                   |       | Lower    | Upper  |                     |    | Lower    | Upper |
| > 3 months before COVID-19                 | 0.856             | 1.154 | 0.245    | 5.435  | -                   | -  | -        | -     |
| Unknown                                    | 0.116             | 5.303 | 0.661    | 42.565 | -                   | -  | -        | -     |
| Not applicable                             | 0.433             | 0.435 | 0.054    | 3.479  | -                   | -  | -        | -     |
| <b>Last chemotherapy prior to COVID-19</b> |                   |       |          |        |                     |    |          |       |
| In the last month before COVID-19          | -                 | -     | -        | -      | -                   | -  | -        | -     |
| In the last 3 months before COVID-19       | 0.123             | 3.459 | 0.715    | 16.726 | -                   | -  | -        | -     |
| > 3 months before COVID-19                 | 0.755             | 1.285 | 0.267    | 6.187  | -                   | -  | -        | -     |

## **Statistical analysis**

Categorical variables were summarized with frequencies and percentages, while continuous variables with median, interquartile range (IQR) and absolute range. Proportions between categories were compared with Fisher's exact test. Additionally, Cox proportional hazard models were developed to evaluate the variables associated to mortality. Variables with p values <0.1 in the univariable models were included into the multivariable one, where Wald backward method was employed. A p value  $\leq 0.05$  was considered significant. No *a priori* sample size calculation was determined. SPSSv25.0 was employed for statistical analyses (SPSS, IBM Corp., Chicago, IL, United States).

EPICOVIDEHA working group

|              |             |                                                                                                                                                              |
|--------------|-------------|--------------------------------------------------------------------------------------------------------------------------------------------------------------|
| Florian      | REIZINE     | University Hospital Rennes, Centre Hospitalier Régional Universitaire Pontchaillou, France                                                                   |
| Malgorzata   | MIKULSKA    | Clinica Malattie Infettive Genova, Genoa, Italy                                                                                                              |
| Hytham K. S. | HAMID       | AOU Caserta, Caserta, Italy                                                                                                                                  |
| Nicola S.    | FRACCHIOLLA | Fondazione IRCCS Ca' Granda Ospedale Maggiore Policlinico, Milan, Italy                                                                                      |
| Francesca    | FARINA      | Hematology and Bone Marrow Transplantation, IRCCS San Raffaele Scientific Institute, Milan, Italy                                                            |
| Nicola       | COPPOLA     | University of Campania, Luigi Vanvitelli, Naples, Italy                                                                                                      |
| Caterina     | BUQUICCHIO  | Haematology Dept., Dimiccoli Hospital, Barletta, Italy                                                                                                       |
| Avinash      | AUJAYEB     | Northumbria Healthcare NHS Foundation Trust, Cramlington, United Kingdom                                                                                     |
| Przemyslaw   | ZDZIARSKI   | Specialist of Infectious Disease and Clinical Immunology Lower Silesian Center Hirsfeld Institute of Immunology and Experimental , Wroclaw, Poland           |
| Maria Chiara | TISI        | Cell Therapy and Hematology, San Bortolo Hospital, Vicenza, Italy                                                                                            |
| Martin       | SCHÖNLEIN   | Department of Oncology, Hematology and Bone Marrow Transplantation with Section of Pneumology, University Medical Center Hamburg-Eppendorf, Hamburg, Germany |
| Gianpaolo    | NADALI      | Policlinico Borgo Roma Verona, Verona, Italy                                                                                                                 |
| Martin       | KOLDITZ     | University Hospital Dresden, Dresden, Germany                                                                                                                |
| Michaela     | HANAKOVA    | Institute of Hematology and Blood Transfusion, Prague, Czech Republic                                                                                        |
| Monica       | FUNG        | University of California San Francisco, Division of Infectious Diseases, San Francisco, USA                                                                  |
| Maureen      | CHBAT       | CHU Versailles, Chesnay, France                                                                                                                              |
| Caroline     | BESSON      | Centre Hospitalier de Versailles, Versailles, France                                                                                                         |
| Valentina    | BONUOMO     | Policlinico Borgo Roma Verona, Verona, Italy                                                                                                                 |
| Ghaith       | ABU-ZEINAH  | Division of Hematology and Oncology, Weill Cornell Medicine, New York, United States                                                                         |
